# Supplementary material for: The Landscape of Pseudomonas aeruginosa Membrane-Associated Proteins
Source: MDPI journal article supplement (doi:10.3390/cells9112421), 2020-11-05
Supplement: s1 [file s1]

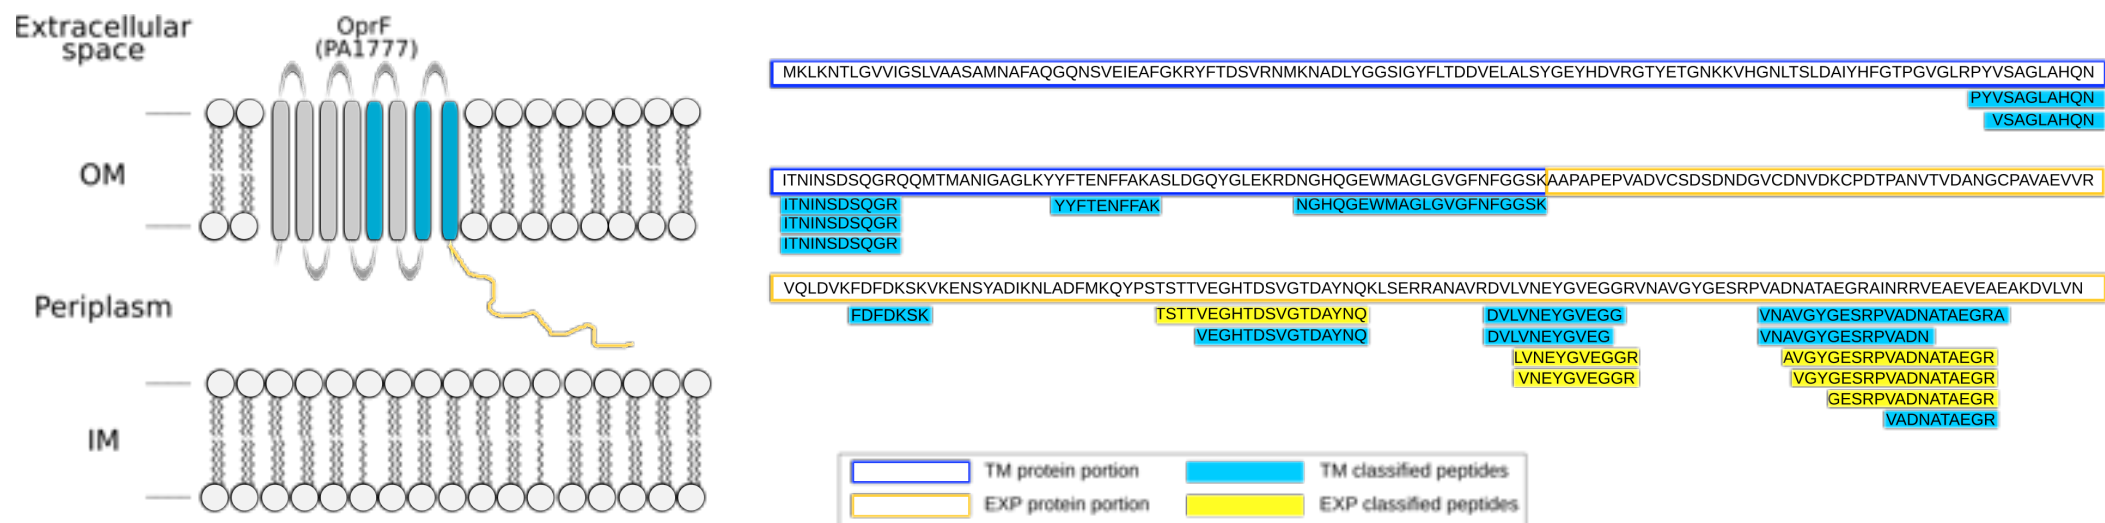

**Figure S1.** Predominant conformer of oprF. It is constituted by a N-terminal beta-barrel domain (aa 1-160), in blue, inserted into membrane and by a C-terminal periplasmic domain rich in alpha-helices (aa 161-312), in yellow. However, in a second conformer the C-terminal periplasmic domain is membrane embedded, too (Sugawara et al. mBio. 2010 Oct 19;1(4):e00228-10; Sugawara et al. FEBS J. 2012 Mar;279(6):910-8).
